# Supplementary material for: A Long-Term Stable Sensor Based on Fe@PCN-224 for Rapid and Quantitative Detection of H2O2 in Fishery Products
Source: MDPI journal article supplement (doi:10.3390/foods10020419), 2021-02-14
Supplement: s1 [file s1]

## Supplementary Materials

**A long-term stable sensor based on Fe@PCN-224 for rapid and quantitative detection of H<sub>2</sub>O<sub>2</sub> in fishery products**

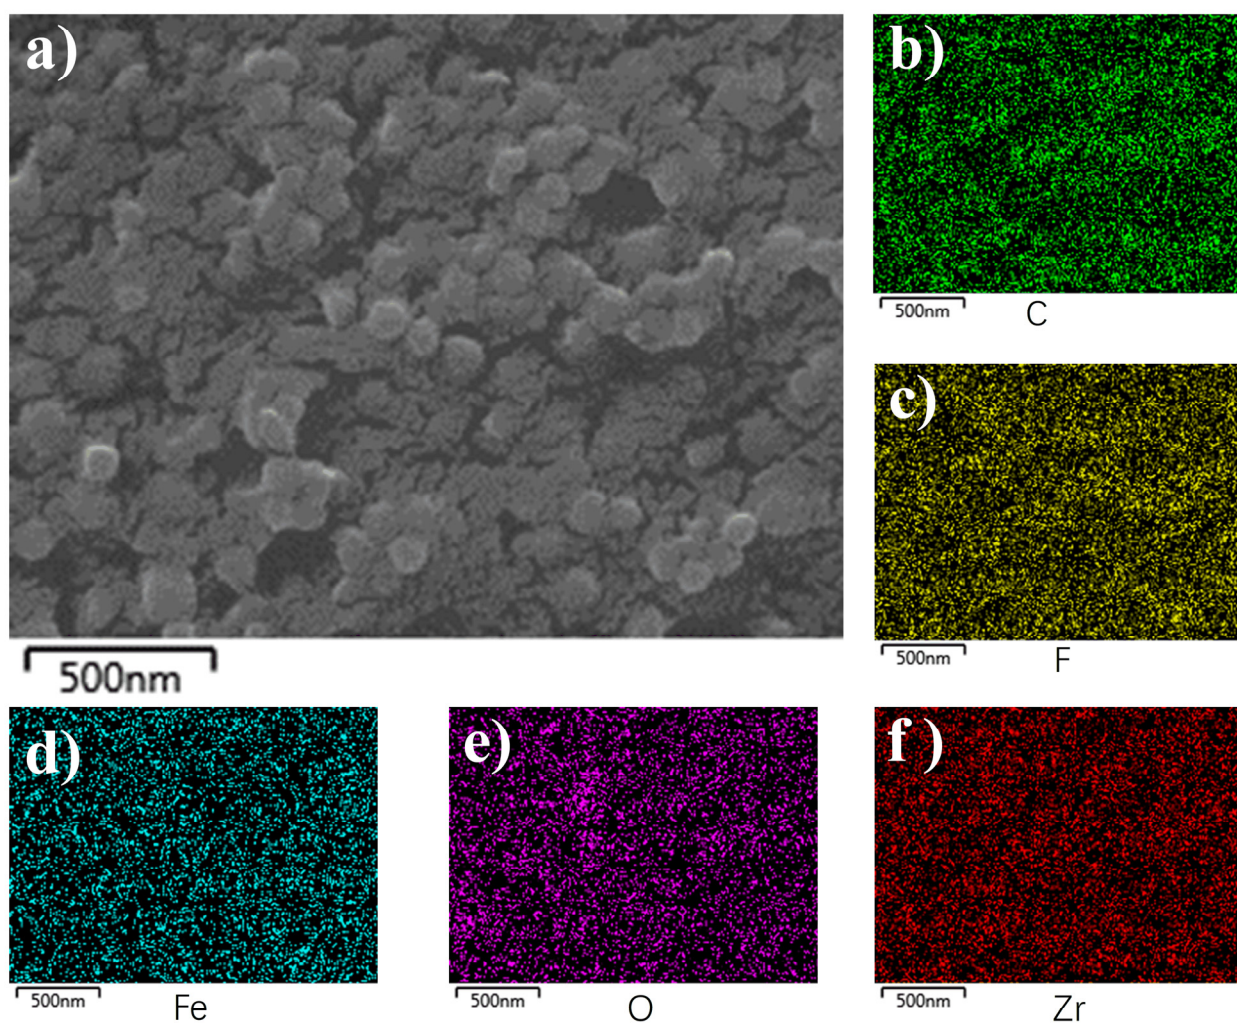

Fig. S1. SEM image of Fe@PCN-224/Nafion (a) and its corresponding elemental mapping images, (b) C, (c) F, (d) Fe, (e) O, (f) Zr.

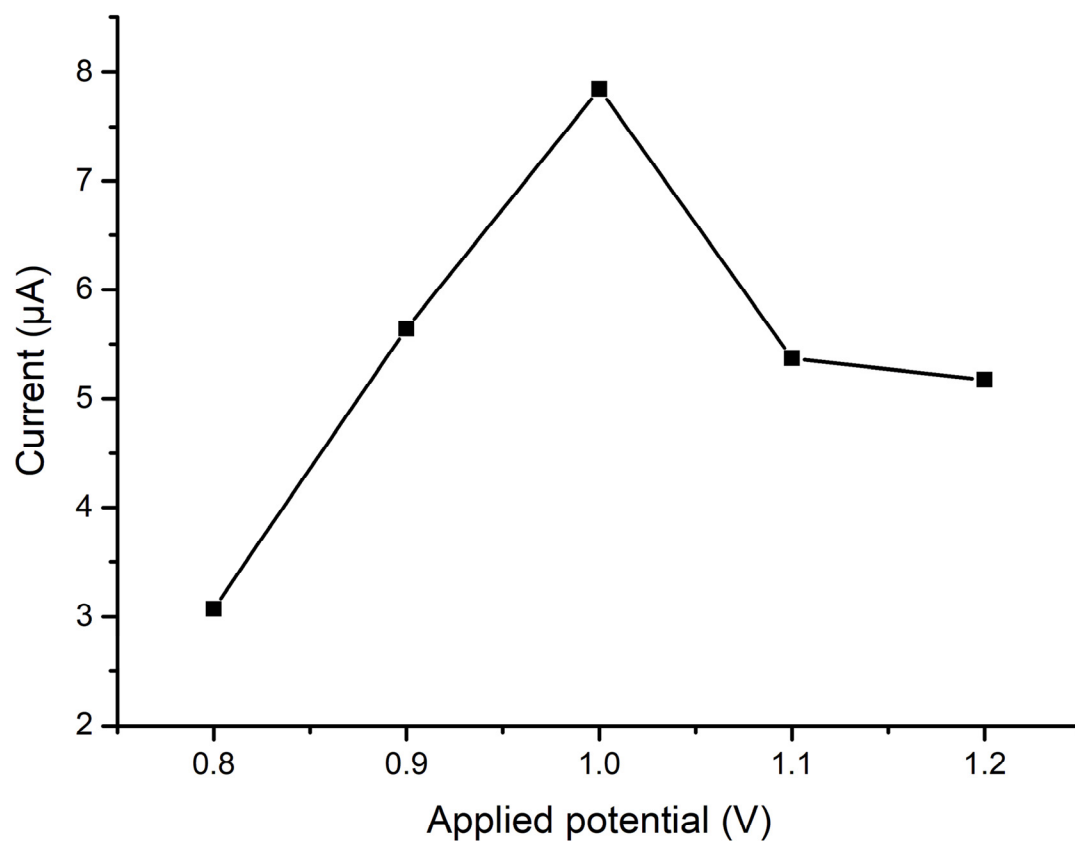

Fig. S2. Effects of applied potential in 0.1 M phosphate buffer (pH 7.0) containing 2 mM H<sub>2</sub>O<sub>2</sub> on the current responses of Fe@PCN-224/Nafion/GCE.

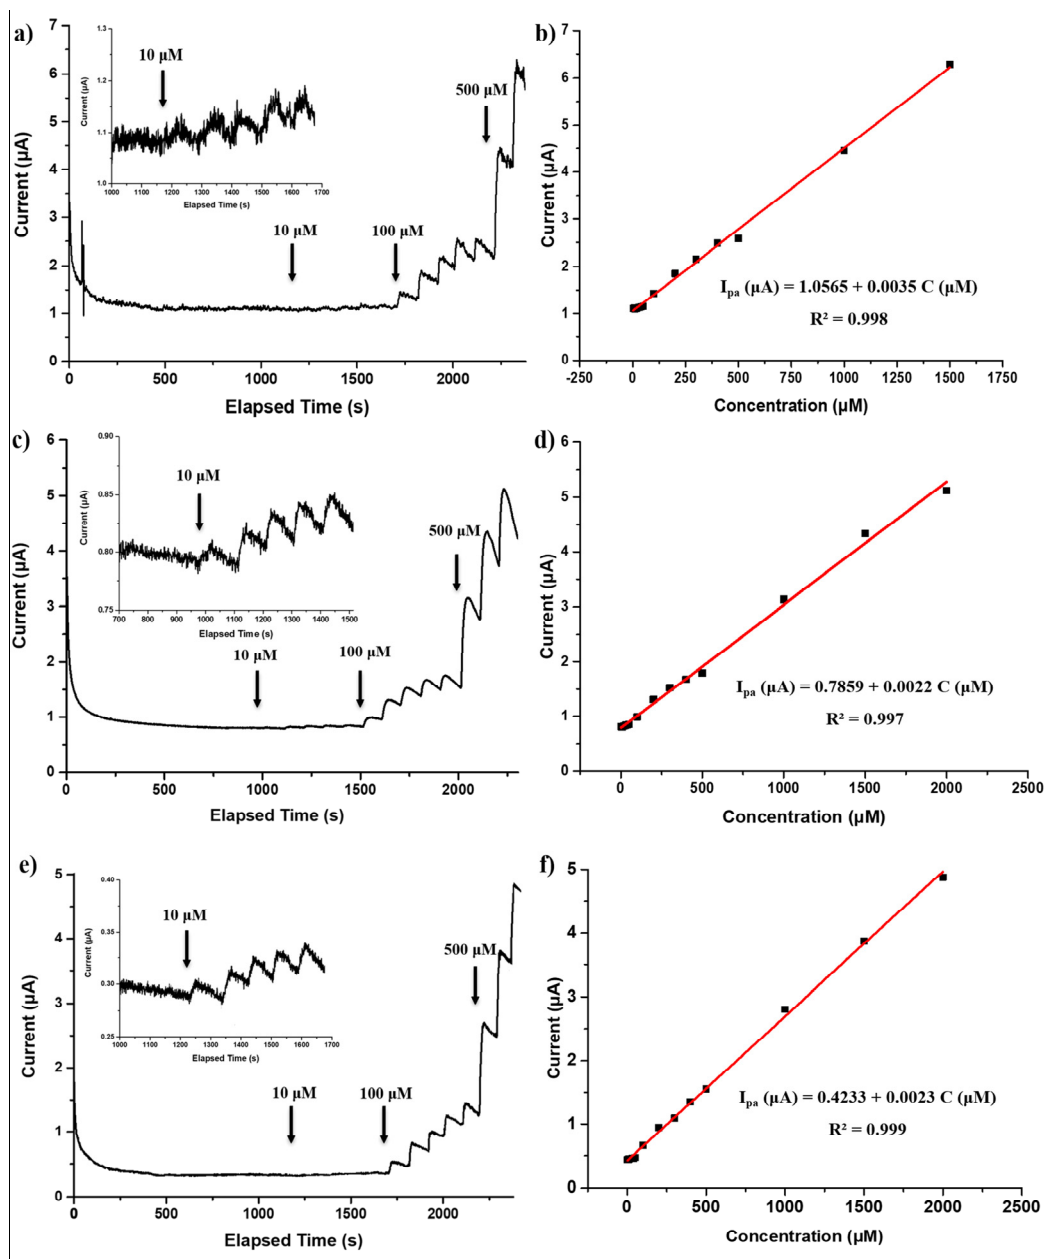

Fig. S3. The typical current–time dynamic response of the Fe@PCN-224/Nafion/GCE with successive additions of  $H_2O_2$  in (a) *Todarodes pacificus*, (c) *Larimichthys polyactis* and (e) *Pennahia argentata*. Inset: Enlarged current–time response curve with  $H_2O_2$  concentrations. The linear relationship between current signal and  $H_2O_2$  concentration in (b) *Todarodes pacificus*, (d) *Larimichthys polyactis* and (f) *Pennahia argentata*.
